# Supplementary material for: Discovering Antioxidant Molecules in the Archaea Domain: Peroxiredoxin Bcp1 fromSulfolobus solfataricusProtects H9c2 Cardiomyoblasts from Oxidative Stress
Source: Hindawi journal article supplement (doi:10.1155/2016/7424870), 2016-01-01
Supplement: f1 [file 7424870.f1.pdf]

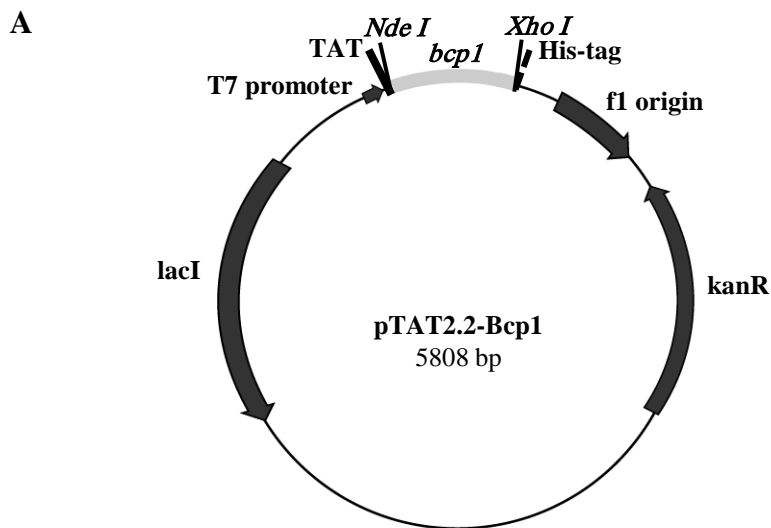

**Figure S1:** Cloning and expression of the TAT-Bcp1 fusion protein. (A) pTAT2.2-Bcp1 map. The T7 promoter region and TAT sequence are indicated by the black lines upstream of the *bcp1* coding region (grey). The His-tag is indicated by a dashed line downstream of *bcp1*. *Nde I* and *Xho I* are the restriction sites used for cloning. (B) SDS-PAGE analysis of the different purification steps for TAT-Bcp1. *Lane 1*: molecular weight markers (Protein Marker VI-Applichem); *lane 2*: *E. coli* BL21-CodonPlus (DE3)-RIL cellular extract; *lane 3*: *E. coli* BL21-CodonPlus (DE3)-RIL cellular extract induced with IPTG; *lane 4*: heat-treated cellular extracts; *lane 5*: IMAC chromatography

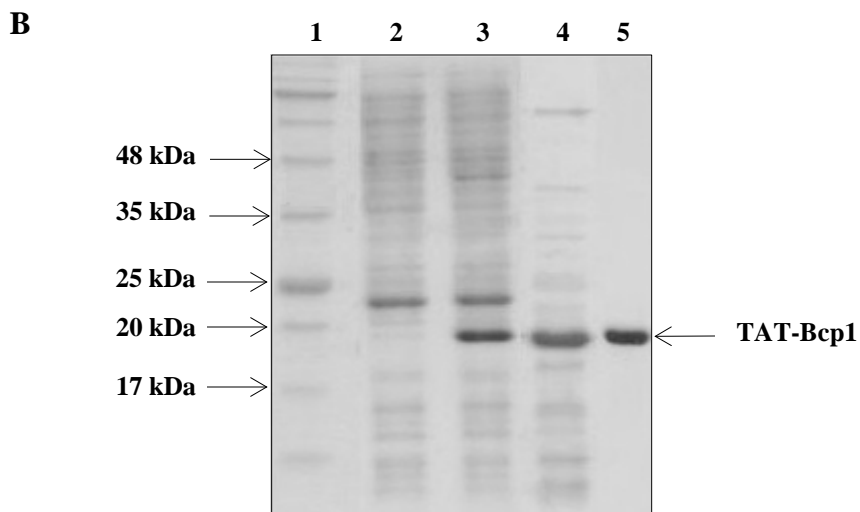

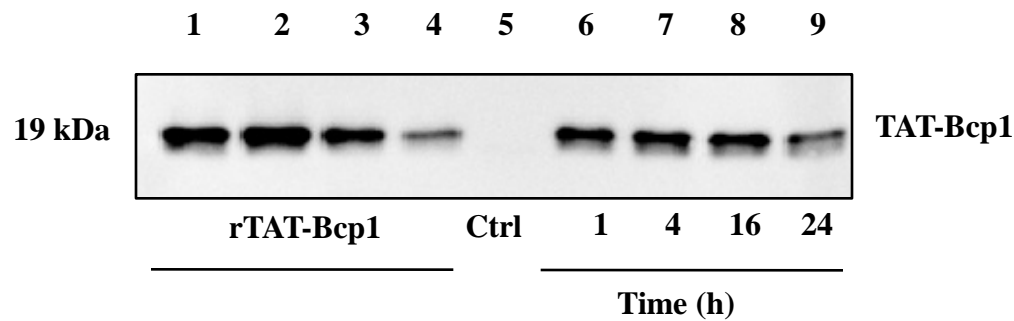

**Figure S2:** Detection of extracellular TAT-Bcp1. A western blot analysis was performed to detect TAT-Bcp1 in the medium of cultured H9c2 cells; the same amounts of conditioned medium were analysed with the penta-His HRP conjugated mAb. H9c2 cells were cultured in growth medium (*lane 5*) and incubated with TAT-Bcp1 (10 μM) for 1 h (*lane 6*), 4 h (*lane 7*), 16 h (*lane 8*) and 24 h (*lane 9*). Decreasing amounts of purified TAT-Bcp1 were loaded to construct a calibration curve: 100 ng (*lane 1*), 75 ng (*lane 2*), 50 ng (*lane 3*), and 25 ng (*lane 4*).

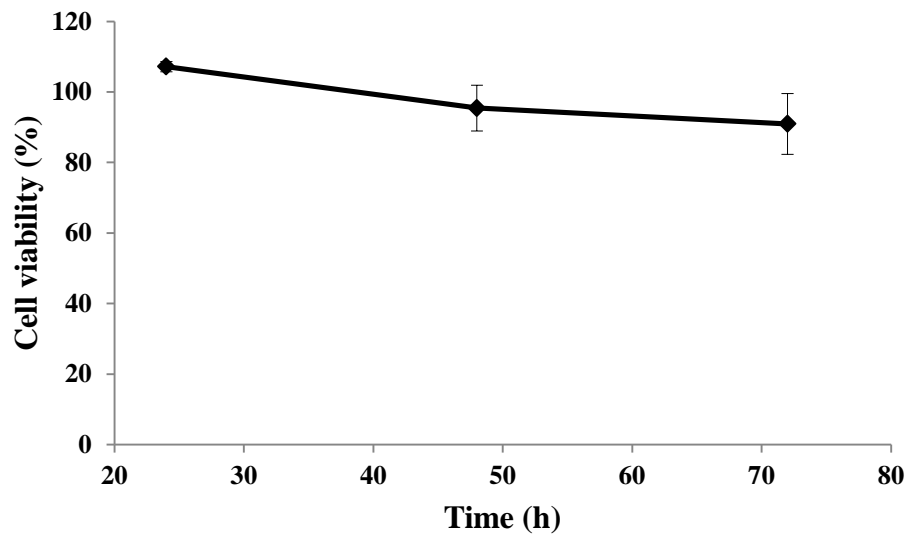

**Figure S3:** Effect of TAT-Bcp1 on H9c2 cell viability at different incubation times. Cell viability was determined using the MTT assay. The cells were cultured in normal growth medium and then treated with TAT-Bcp1 (10  $\mu$ M) for 24 h, 48 h and 72 h. Cell viability was evaluated by measuring the  $A_{570\text{nm}}$ ; the data are expressed as the mean percentages  $\pm$  S.D. compared to the control. \*  $p < 0.001$ ; the results were derived from four replicates of a representative experiment.
